# Supplementary material
Source: PubMed Central journal article supplement (PMC4361307)
Supplement: NIHMS649999-supplement-Supp_FigureS1___TableS1-S2.pdf [file NIHMS649999-supplement-Supp_FigureS1___TableS1-S2.pdf]

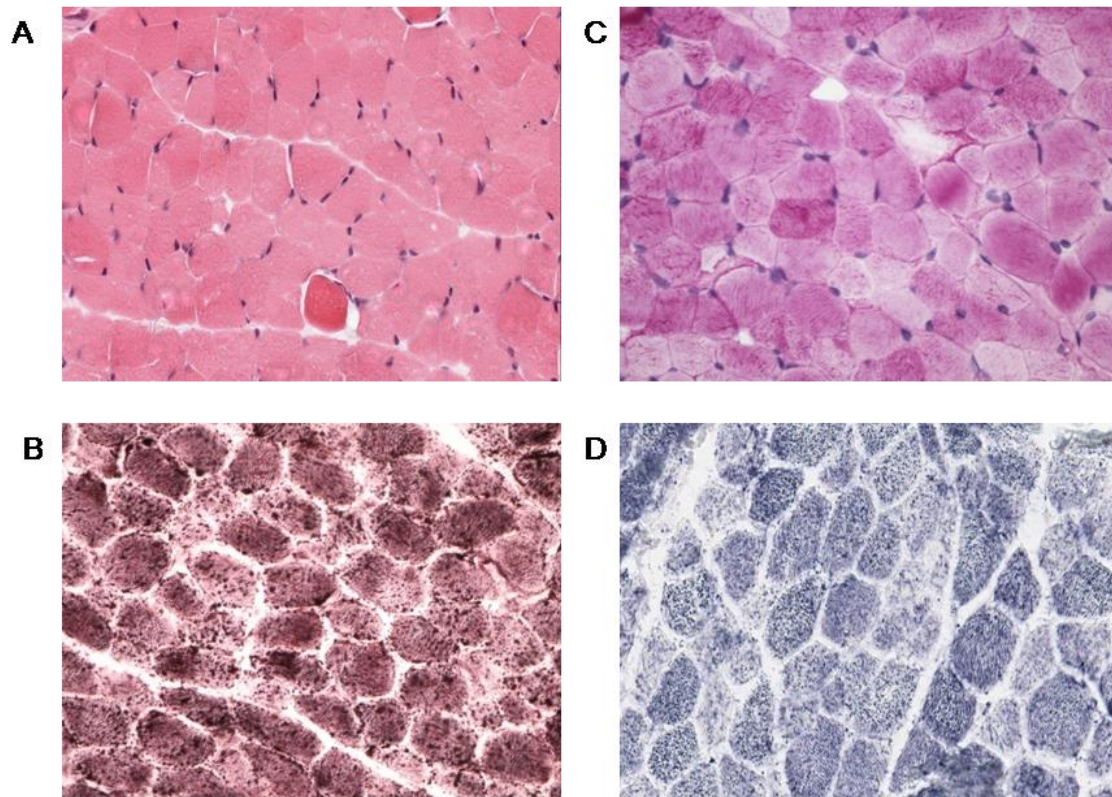

**Supp. Figure S1.** Frozen muscle - 400 X. **A.** H&E stain Variation in fiber size with isolated small atrophic fibers and hypereosinophilic fibers. **B.** COX Positive coarse granular pattern. **C.** PAS stain: Variation in fiber size with scattered atrophic small fibers. **D.** SDH Positive coarse granular pattern.

**Supp. Table S1. Mitochondrial Respiratory Chain Enzymes analysis [RCA] in Muscle**

| <b>Enzyme</b>                                                      | <b>Patient [% of mean]</b> | <b>Controls [+/- SD ]</b> | <b>Interpretation</b> |
|--------------------------------------------------------------------|----------------------------|---------------------------|-----------------------|
| <b>NADH: ferricyanide dehydrogenase [CoI]</b>                      | 421 [150]                  | 280+/-91                  | Normal                |
| <b>NADH: cytochrome c reductase [Co I+III]</b>                     | 70.1 [137]                 | 51.2+/-8.6                | Normal                |
| <b>NADH: cytochrome c reductase, rotenone sensitive [Co I+III]</b> | 22.8 [96]                  | 23.6+/-4.6                | Normal                |
| <b>Succinate dehydrogenase [CoII]</b>                              | 10.93 [135]                | 8.1+/-2.5                 | Normal                |
| <b>Succinate cytochrome C reductase [CoII +III]</b>                | 3.85 [91]                  | 4.2+/-1.9                 | Normal                |
| <b>Cytochrome C oxydase [Co IV]</b>                                | 64 [219]                   | 29.2+/-9.1                | Normal                |
| <b>Citrate Synthetase</b>                                          | 360 [129]                  | 280+/-95                  | Normal                |

As per clinical request on frozen portion of muscle, RCA was performed by BaylorCollege of Medicine Genetics Laboratory in Houston, TX.

Interpretation: Deficiencies in mitochondrial electron chains enzymes were not detected using spectrophotometer. The interpretation of the results is done on the assumption that the specimen has been handled properly. This result cannot confirm or exclude the diagnosis of a mitochondrial respiratory chain disorder.

**Supp. Table S2. Peptides corresponding to the 110kDa band identified by LC-MS/MS***heat shock 70 protein 4 (Hsp 70)*

Coverage 39.5%

| Peptide                           | Position  | P value  | XCorr | DeltaCn |
|-----------------------------------|-----------|----------|-------|---------|
| AGGIETIANEYSDR                    | 20 - 33   | 4.68E-09 | 3.723 | 0.3     |
| AFSDPFVEAEK                       | 74 - 84   | 4.55E-06 | 3.580 | 0.6     |
| SNLAYDIVQLPTGLTGIK                | 85 - 102  | 2.31E-11 | 4.231 | 0.5     |
| NFTTEQVTAMLLSK                    | 111 - 124 | 3.41E-08 | 3.972 | 0.4     |
| LMNETTAVALAYGIYK                  | 170 - 185 | 7.23E-10 | 4.536 | 0.6     |
| VLATAFDTTLGGR                     | 222 - 234 | 1.19E-09 | 4.047 | 0.6     |
| LKKEDIYAVEIVGGATR                 | 330 - 346 | 7.00E-04 | 2.339 | 0.4     |
| KEDIYAVEIVGGATR                   | 332 - 346 | 5.62E-09 | 3.398 | 0.5     |
| EDIYAVEIVGGATR                    | 333 - 346 | 1.04E-07 | 2.530 | 0.5     |
| ELSTTLNADEAVTR                    | 361 - 374 | 7.81E-05 | 2.674 | 0.5     |
| EFSITDVVPYPISLR                   | 391 - 405 | 8.68E-07 | 2.670 | 0.6     |
| EPFTLEAYYSSPQDLPPYDPAIAQFSVQK     | 438 - 466 | 4.16E-14 | 3.993 | 0.4     |
| VNVHGIFSVSSASLVEVHK               | 484 - 502 | 3.15E-03 | 2.315 | 0.2     |
| TSTVDLPIENQLLWQIDR                | 574 - 591 | 1.18E-08 | 4.504 | 0.5     |
| EMLNLYIENEGK                      | 592 - 603 | 9.18E-05 | 3.678 | 0.3     |
| NAVVEYVYEMR                       | 619 - 629 | 9.48E-06 | 2.953 | 0.3     |
| FVSEDDRNSFTLK                     | 639 - 651 | 3.91E-03 | 2.341 | 0.2     |
| LEDTENWLYEDGEDQPK                 | 652 - 668 | 3.94E-11 | 3.938 | 0.4     |
| STNEAMEWMNNK                      | 737 - 748 | 2.34E-02 | 2.115 | 0.4     |
| IKELTSTCSPISKPK                   | 772 - 787 | 1.61E-03 | 4.221 | 0.5     |
| NAEQNGPVDGQGDNPGPQAAEQGTDTAVPSDSK | 799 - 832 | 1.63E-04 | 3.861 | 0.2     |
| KLPEMDID                          | 833 - 840 | 3.10E-02 | 1.768 | 0.2     |
